# Supplementary material for: Electrocatalytic Oxygen Reduction to Hydrogen Peroxide on Graphdiyne-Based Single-Atom Catalysts: First-Principles Studies
Source: MDPI journal article supplement (doi:10.3390/catal13020307), 2023-01-30
Supplement: s1 [file s1]

# Electrocatalytic Oxygen Reduction to Hydrogen Peroxide on Graphdiyne-Based Single-Atom Catalysts: First-Principles Studies

Kangkang Lian <sup>1</sup>, Qiang Wan<sup>1</sup>, Rong Jiang <sup>2,\*</sup>, Sen Lin <sup>1,\*</sup>

<sup>1</sup> State Key Laboratory of Photocatalysis on Energy and Environment, College of Chemistry, Fuzhou University, Fuzhou 350002, China

<sup>2</sup> Institute of Advanced Energy Materials, College of Chemistry, Fuzhou University, Fuzhou 350002, China

\* Correspondence: jiangrong@fzu.edu.cn (R.J.); slin@fzu.edu.cn (S.L.);

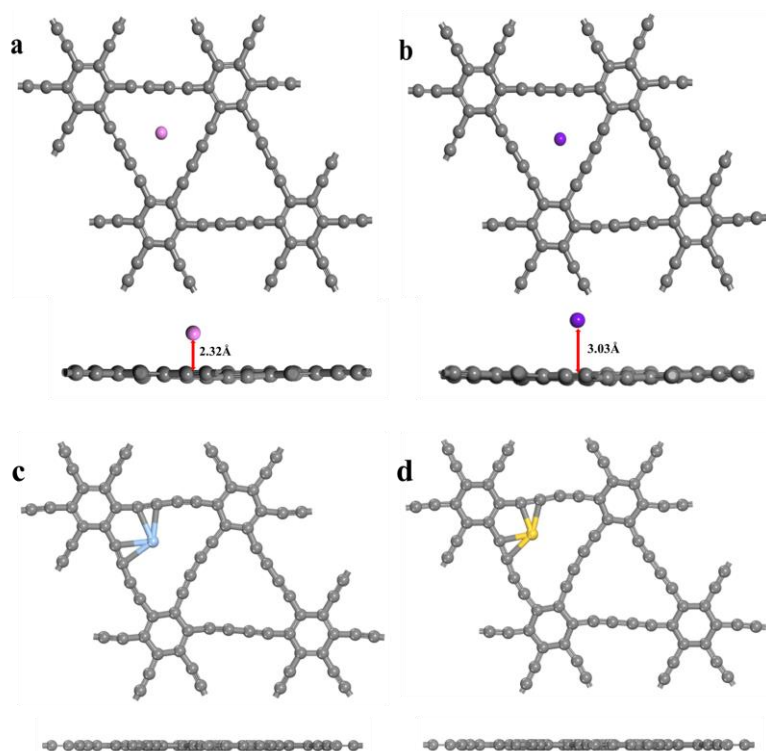

**Figure S1.** Top and side views of the (a) Zn atom, (b) Cd atom, (c) Ag atom and (d) Au atom supported on GDY. Color scheme: C: Gray; Zn: Pink; Cd: Purple; Ag: Blue; Au: Yellow.

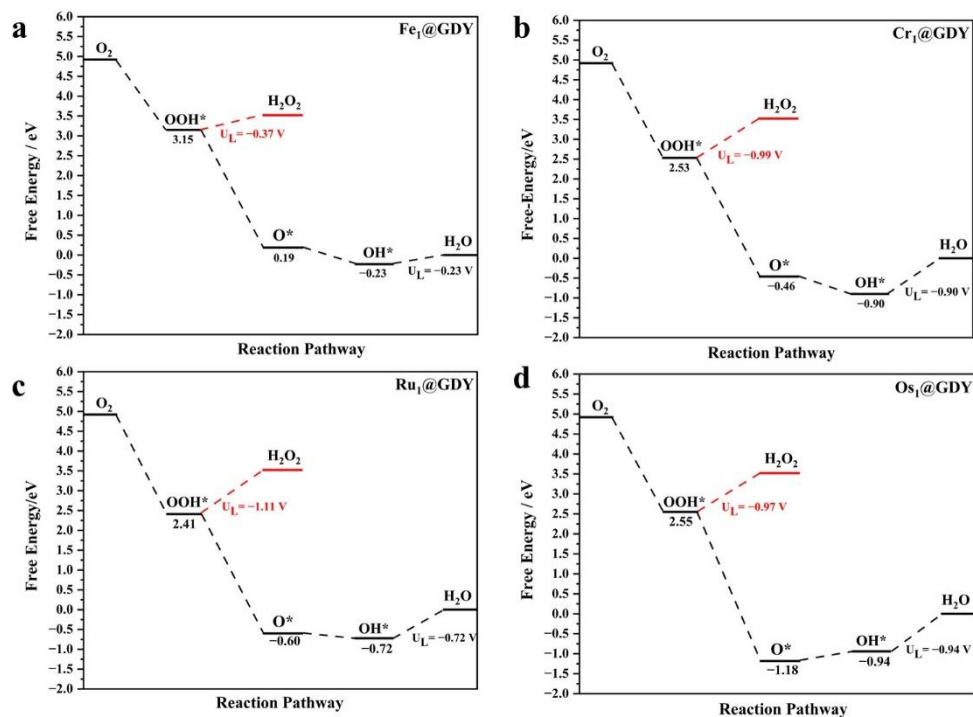

**Figure S2.** Free energy diagrams of 2e<sup>-</sup> and 4e<sup>-</sup> ORR on (a): Fe<sub>1</sub>@GDY; (b): Cr<sub>1</sub>@GDY; (c): Ru<sub>1</sub>@GDY; d: Os<sub>1</sub>@GDY.

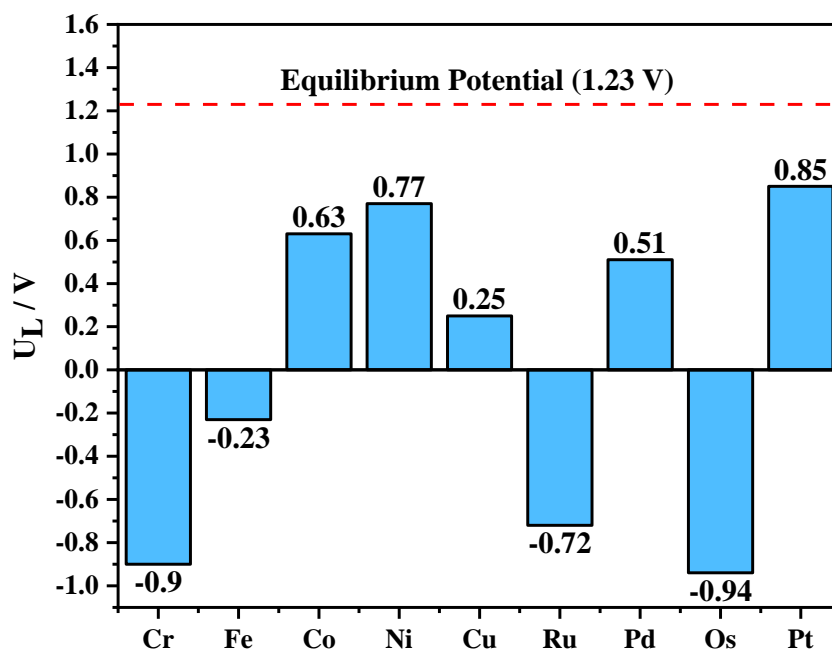

**Figure S3.** Limiting potentials of 4e<sup>-</sup> ORR on TM<sub>1</sub>@GDY (TM=Cr, Fe, Co, Ni, Cu, Ru, Pd, Os, and Pt) catalysts. The red line represents the equilibrium potential of 4e<sup>-</sup> ORR.

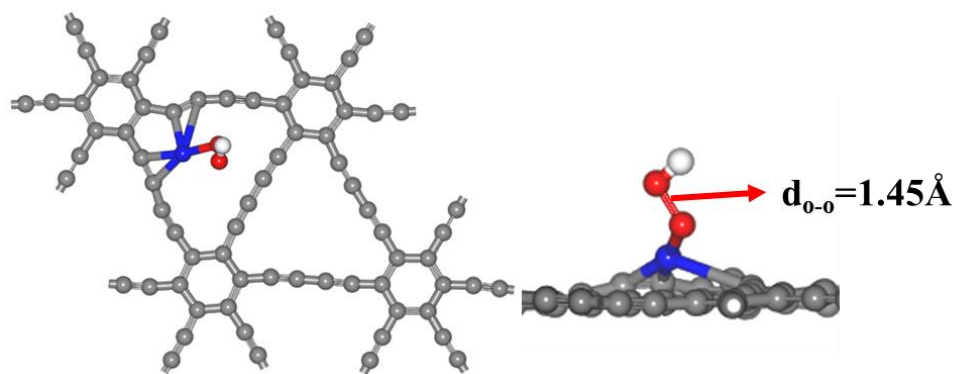

**Figure S4.** The adsorption structure of OOH\* on Pt<sub>1</sub>@GDY and the O–O bond length.

**Table S1.** The E<sub>b</sub> on TM<sub>1</sub>@GDY.

| TM <sub>1</sub> @GDY | E <sub>b</sub> (eV) |
|----------------------|---------------------|
| Sc <sub>1</sub> @GDY | –4.41               |
| Ti <sub>1</sub> @GDY | –4.57               |
| V <sub>1</sub> @GDY  | –3.54               |
| Cr <sub>1</sub> @GDY | –3.62               |
| Mn <sub>1</sub> @GDY | –2.39               |
| Fe <sub>1</sub> @GDY | –3.39               |
| Co <sub>1</sub> @GDY | –4.08               |
| Ni <sub>1</sub> @GDY | –4.26               |
| Cu <sub>1</sub> @GDY | –2.00               |
| Zn <sub>1</sub> @GDY | –0.19               |
| Y <sub>1</sub> @GDY  | –4.67               |
| Zr <sub>1</sub> @GDY | –5.54               |
| Nb <sub>1</sub> @GDY | –5.58               |
| Mo <sub>1</sub> @GDY | –2.96               |
| Ru <sub>1</sub> @GDY | –4.65               |
| Rh <sub>1</sub> @GDY | –4.01               |

|                      |       |
|----------------------|-------|
| Pd <sub>1</sub> @GDY | -2.68 |
| Ag <sub>1</sub> @GDY | -0.71 |
| Cd <sub>1</sub> @GDY | -0.19 |
| Hf <sub>1</sub> @GDY | -5.20 |
| Ta <sub>1</sub> @GDY | -5.15 |
| W <sub>1</sub> @GDY  | -3.87 |
| Re <sub>1</sub> @GDY | -3.28 |
| Os <sub>1</sub> @GDY | -5.13 |
| Ir <sub>1</sub> @GDY | -4.89 |
| Pt <sub>1</sub> @GDY | -4.06 |
| Au <sub>1</sub> @GDY | -0.85 |

**Table S2.** The G<sub>OOH</sub>\* on TM<sub>1</sub>@GDY.

| TM <sub>1</sub> @GDY | G <sub>OOH</sub> * (eV) |
|----------------------|-------------------------|
| Sc <sub>1</sub> @GDY | 2.07                    |
| Ti <sub>1</sub> @GDY | 1.61                    |
| V <sub>1</sub> @GDY  | 1.63                    |
| Cr <sub>1</sub> @GDY | 2.53                    |
| Mn <sub>1</sub> @GDY | 2.95                    |
| Fe <sub>1</sub> @GDY | 3.15                    |
| Co <sub>1</sub> @GDY | 3.44                    |
| Ni <sub>1</sub> @GDY | 3.76                    |
| Cu <sub>1</sub> @GDY | 3.50                    |
| Y <sub>1</sub> @GDY  | 2.17                    |
| Zr <sub>1</sub> @GDY | 1.37                    |
| Ru <sub>1</sub> @GDY | 2.41                    |
| Rh <sub>1</sub> @GDY | 3.17                    |
| Pd <sub>1</sub> @GDY | 4.41                    |

|        |      |
|--------|------|
| Hf@GDY | 1.57 |
| Os@GDY | 2.55 |
| Ir@GDY | 2.94 |
| Pt@GDY | 4.07 |
